# Supplementary material for: Tailoring oxygen vacancies and active surface oxygen species in CrOx hierarchical strawberry-type three-dimensional (3D) micro-spindle catalysts for total catalytic oxidation of VOCs
Source: Royal Society of Chemistry journal article supplement (doi:10.1039/d3nj03281g), 2023-01-01
Supplement: d3nj03281g1.pdf [file d3nj03281g1.pdf]

# Tailoring Oxygen Vacancies and Active Surface Oxygen Species in CrO<sub>x</sub> Hierarchical Strawberry-Type Three-Dimensional (3D) Micro-Spindles Catalysts for Total Catalytic Oxidation of VOCs

Shankha S. Acharyya,<sup>\*a,b</sup> Swati Rana,<sup>a</sup> Sachin K. Sharma,<sup>a</sup> Mukesh K. Poddar,<sup>a</sup> Vinod Kumar,<sup>c</sup> Takehiko Sasaki,<sup>d</sup> Shilpi Ghosh,<sup>\*a,b</sup> and Rajaram Bal<sup>\*a</sup>

---

<sup>a</sup>Light Stock Processing Division, CSIR-Indian Institute of Petroleum, Dehradun- 248005, Uttarakhand, India; E-mail: [raja@iip.res.in](mailto:raja@iip.res.in)

<sup>b</sup> Research Initiative for Supra-Materials (RISM) Interdisciplinary Cluster for Cutting Edge Research, Shinshu University, Nagano 380-8553, Japan; E-mail: [acharyya\\_shankha@shinshu-u.ac.jp](mailto:acharyya_shankha@shinshu-u.ac.jp); [shlpghsh@gmail.com](mailto:shlpghsh@gmail.com)

<sup>c</sup>Dept. of Pharmacology and Toxicology, National Institute of Pharmaceutical Education and Research (NIPER), Mohali, India

<sup>d</sup>Graduate School of Frontier Science, The University of Tokyo, Kashiwa, Chiba 277-8561, Japan

**Table S1.** Earlier Reports of total oxidation of VOC's over Cr-based catalysts

| Entry | Catalyst                                                                                                                                 | Substrate                                                                                                                                                                                                       | Catalytic Performance        | Ref       |
|-------|------------------------------------------------------------------------------------------------------------------------------------------|-----------------------------------------------------------------------------------------------------------------------------------------------------------------------------------------------------------------|------------------------------|-----------|
| 1     | MCM-48 supported Chromium (Cr/MCM-48)                                                                                                    | Trichloroethylene                                                                                                                                                                                               | T <sub>100</sub> : 350 °C    | 1         |
| 2     | 3D Mesoporous Chromium oxide, prepared by Neutral Templating Route                                                                       | Toluene                                                                                                                                                                                                         | T <sub>100</sub> : 280–300°C | 2         |
| 3     | 0.5% Pt/CrOOH                                                                                                                            | 1,2-Dichloroethane<br>(Flow rate: 46,000 h <sup>-1</sup> )                                                                                                                                                      | T <sub>90</sub> : 317 °C     | 3         |
| 4     | 3D Mesoporous chromium oxide prepared by a Neutral Templating Route                                                                      | Toluene<br>(GHSV = 30,000 h <sup>-1</sup> )                                                                                                                                                                     | T <sub>90</sub> : 300 °C     | 4         |
| 5     | Mesoporous Cr <sub>2</sub> O <sub>3</sub> prepared using 3D cubic mesoporous silica: KIT-6 (Hard Template)                               | Toluene                                                                                                                                                                                                         | T <sub>50</sub> : 205 °C     | 5         |
| 6     | Mesoporous Cr <sub>2</sub> O <sub>3</sub> with ordered 3D hexagonal polycrystalline structures using KIT-6 (Hard Template)               | Toluene<br>(Space vel. = 20000 h <sup>-1</sup> )                                                                                                                                                                | T <sub>90</sub> : 300 °C     | 6         |
| 7     | Chromium-and Copper-modified SBA-15 (Cr <sub>3</sub> Cu <sub>7</sub> /SBA-15)                                                            | Toluene<br>(WHSV = 1.2 h <sup>-1</sup> )                                                                                                                                                                        | T <sub>100</sub> : 360 °C    | 7         |
| 8     | Chromium & Cerium modified USY Zeolite catalysts (Cr <sub>2</sub> O <sub>3</sub> -CeO <sub>2</sub> -USY) prepared by Impregnation Method | Dichloromethane                                                                                                                                                                                                 | T <sub>90</sub> : 281 °C     | 8         |
| 9     | Cake-like Cr <sub>2</sub> O <sub>3</sub> prepared in Microemulsion Methods                                                               | Toluene                                                                                                                                                                                                         | T <sub>90</sub> : 240 °C     | 9         |
| 10    | γ-Alumina supported Chromium oxide catalysts by Impregnation Method                                                                      | Benzene                                                                                                                                                                                                         | T <sub>100</sub> : 350 °C    | 10        |
| 11    | CeO <sub>2</sub> -CrO <sub>x</sub> oxide prepared using (NH <sub>4</sub> ) <sub>2</sub> CO <sub>3</sub> as Precipitant.                  | Cl-VOC (CH <sub>2</sub> Cl <sub>2</sub> + C <sub>6</sub> H <sub>5</sub> Cl + C <sub>2</sub> H <sub>4</sub> Cl <sub>2</sub> + C <sub>2</sub> HCl <sub>3</sub> )<br>GHSV: 9000mLg <sup>-1</sup> h <sup>-1</sup> ) | T <sub>90</sub> : 295 °C     | 11        |
| 12    | Cr/TiO <sub>2</sub> porous microspheres prepared by hydrothermal method                                                                  | Chlorobenzene<br>(GHSV 15,000 h <sup>-1</sup> )                                                                                                                                                                 | T <sub>90</sub> : 265.73 °C  | 12        |
| 13    | MnOx/Cr <sub>2</sub> O <sub>3</sub> composites prepared by Pyrolysis of Cr-MOF precursors (MIL-101-Cr)                                   | Toluene<br>(60,000 mL/gh)                                                                                                                                                                                       | T <sub>90</sub> : 259 °C     | 13        |
| 14    | Cr modified ZSM-5 zeolite                                                                                                                | Trichloroethylene                                                                                                                                                                                               | T <sub>90</sub> : 495 °C     | 14        |
| 15    | Hierarchical Strawberry-Type Three-Dimensional (3D) CrOx Micro-Spindles                                                                  | Toluene                                                                                                                                                                                                         | T <sub>90</sub> : 270 °C     | This Work |

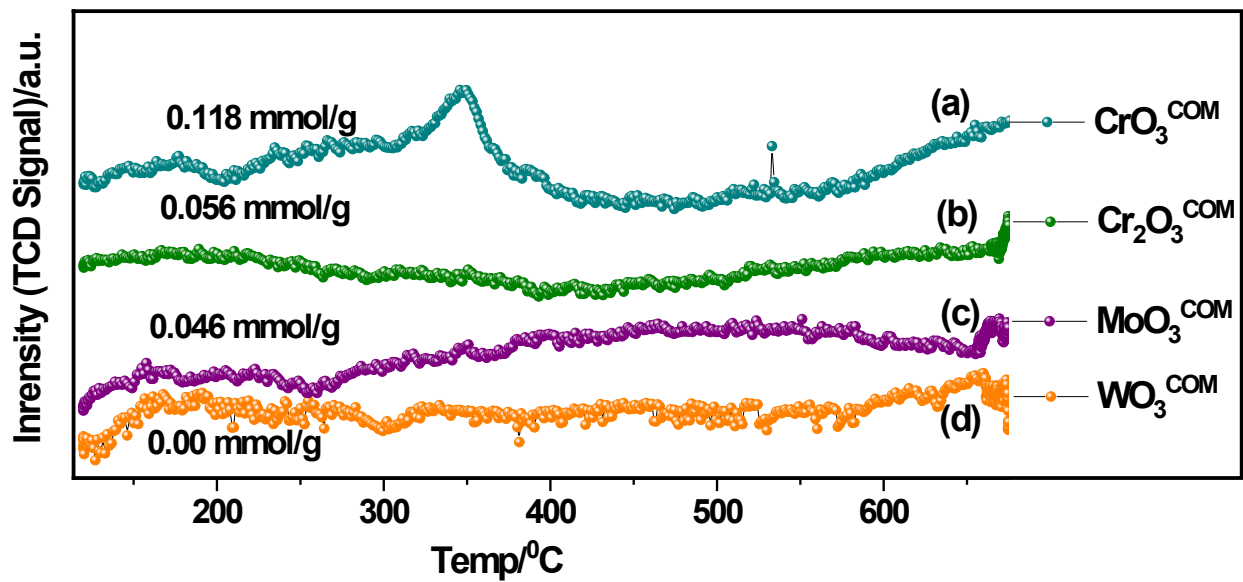

**Fig S1.** NH<sub>3</sub>-TPD profiles of commercial (a) chromium (VI) oxide, (b) chromium (III) oxide, (c) molybdenum (VI) oxide and (d) tungsten (VI) oxide.

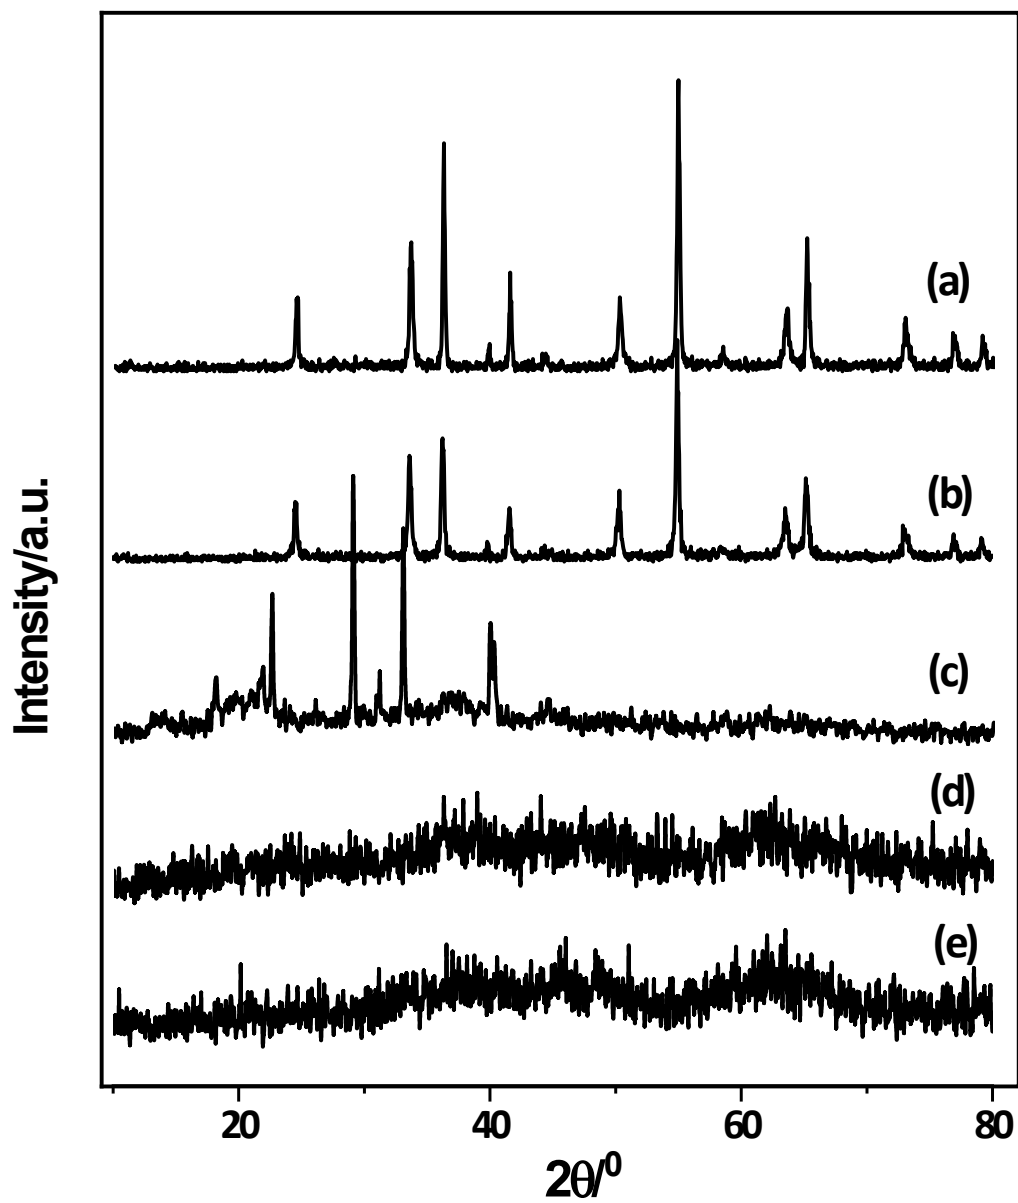

**Fig. S2.** XRD diffractogram of products (chromium oxide) calcined at (a) 750 °C; (b) 550 °C; (c) 450 °C; (d) 350 °C and (e) 150 °C.

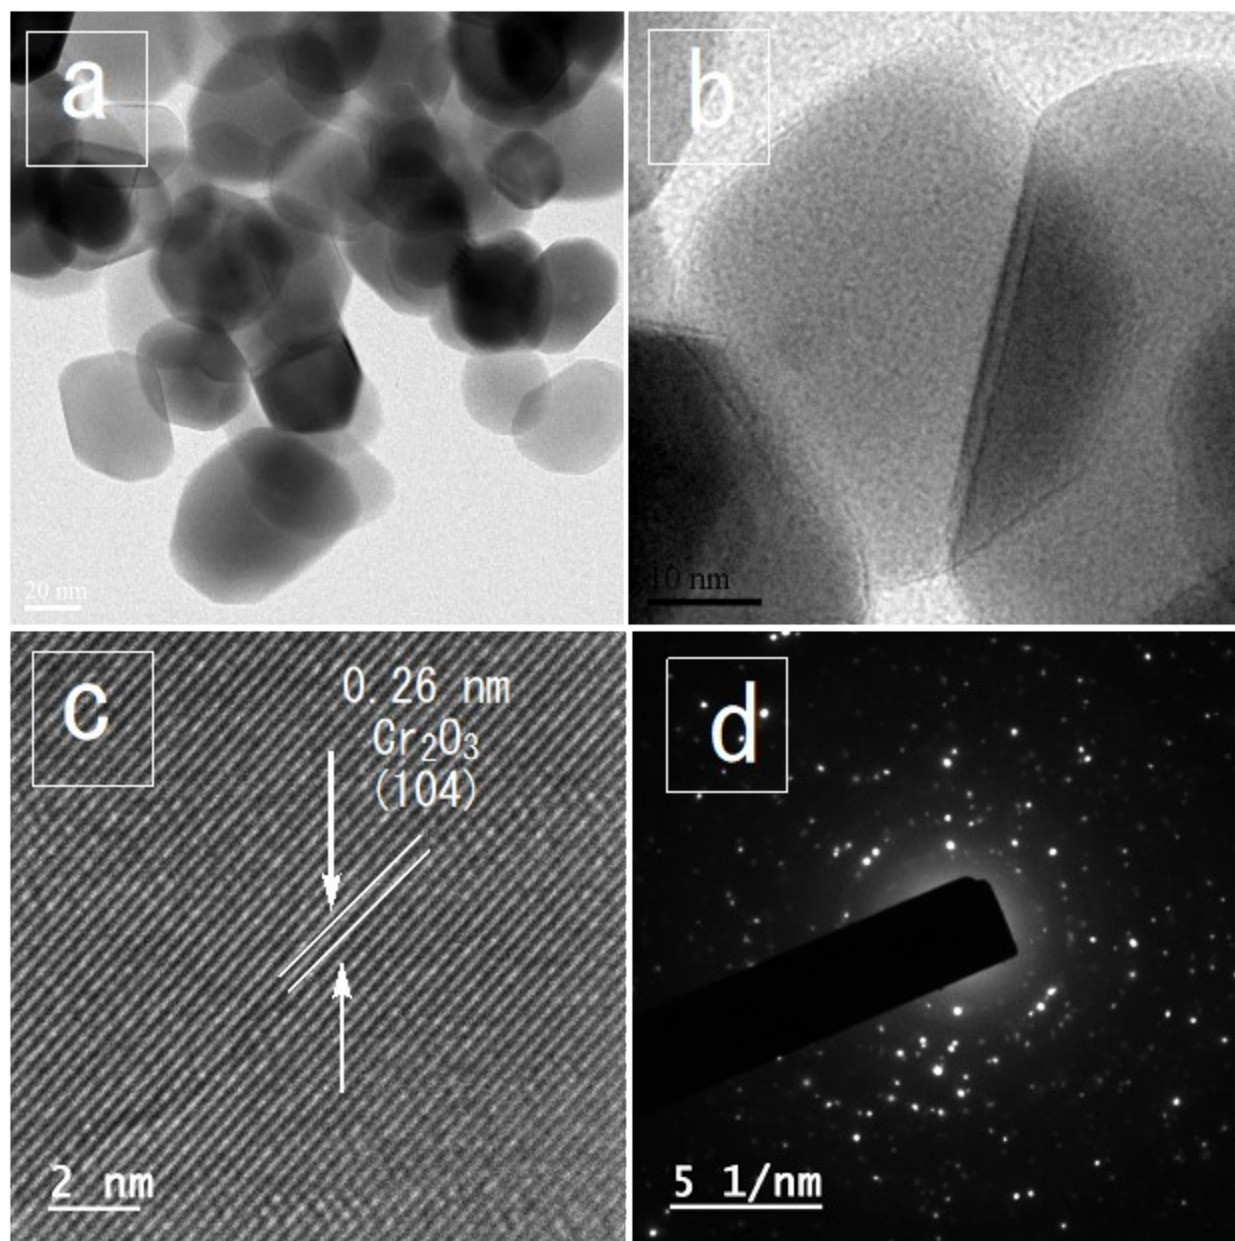

**Fig. S3** TEM image of fresh chromium oxide nanoparticles catalyst i.e.  $\text{Cr}_2\text{O}_3^{\text{NIT}}$  (a)-(c) with successively higher magnifications and (d) the corresponding SAED diagram.

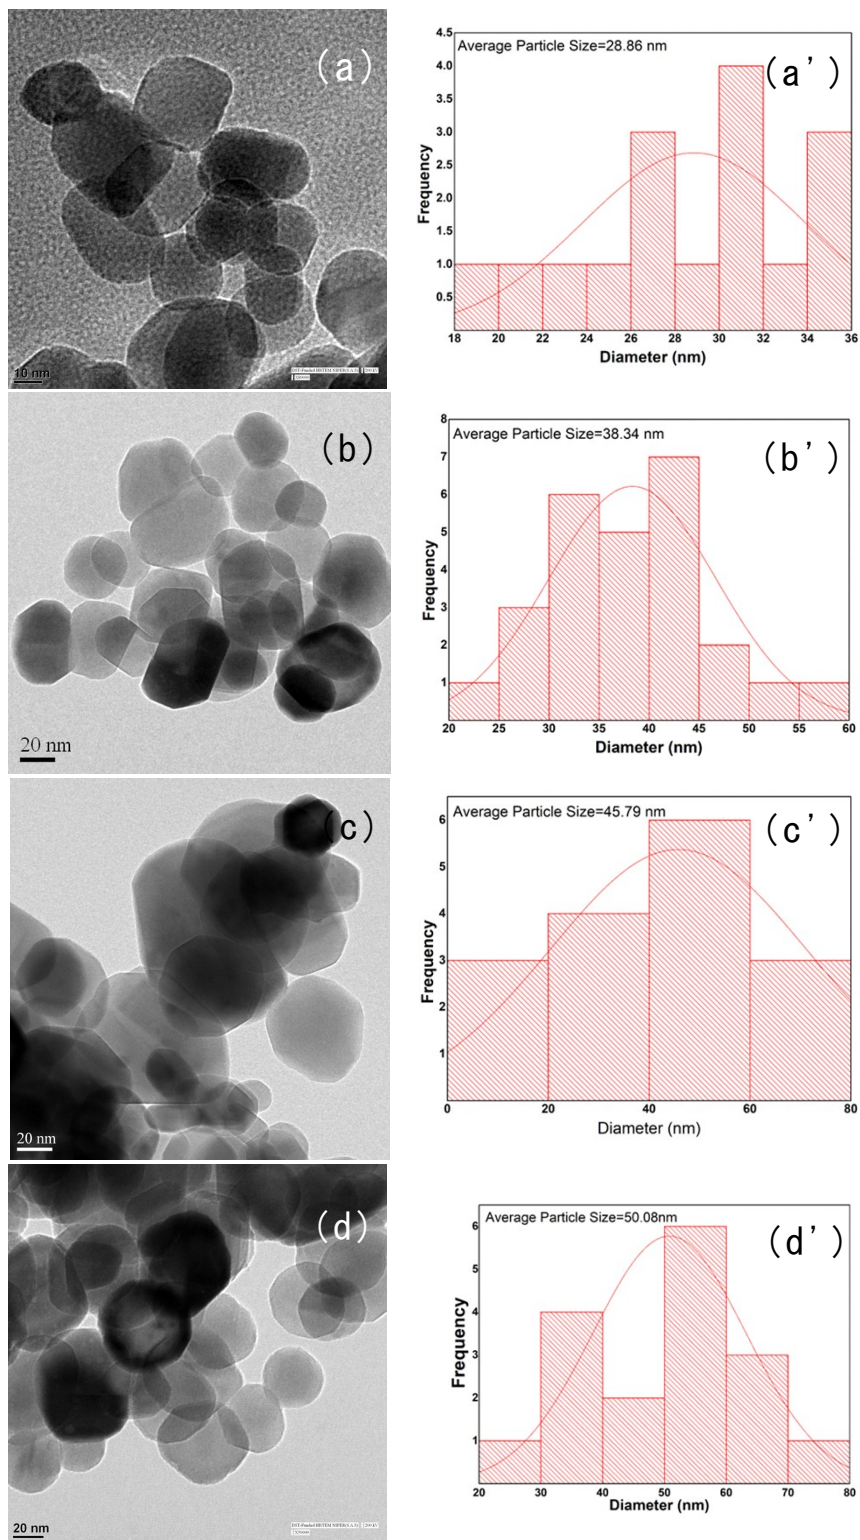

**Fig. S4** HRTEM images and the respective particle size distribution (histogram) of (a) fresh and (b) spent  $\text{CrOx}^{\text{K-SB}}$  and that of (c) fresh and (d) spent  $\text{Cr}_2\text{O}_3^{\text{NIT}}$  catalysts.

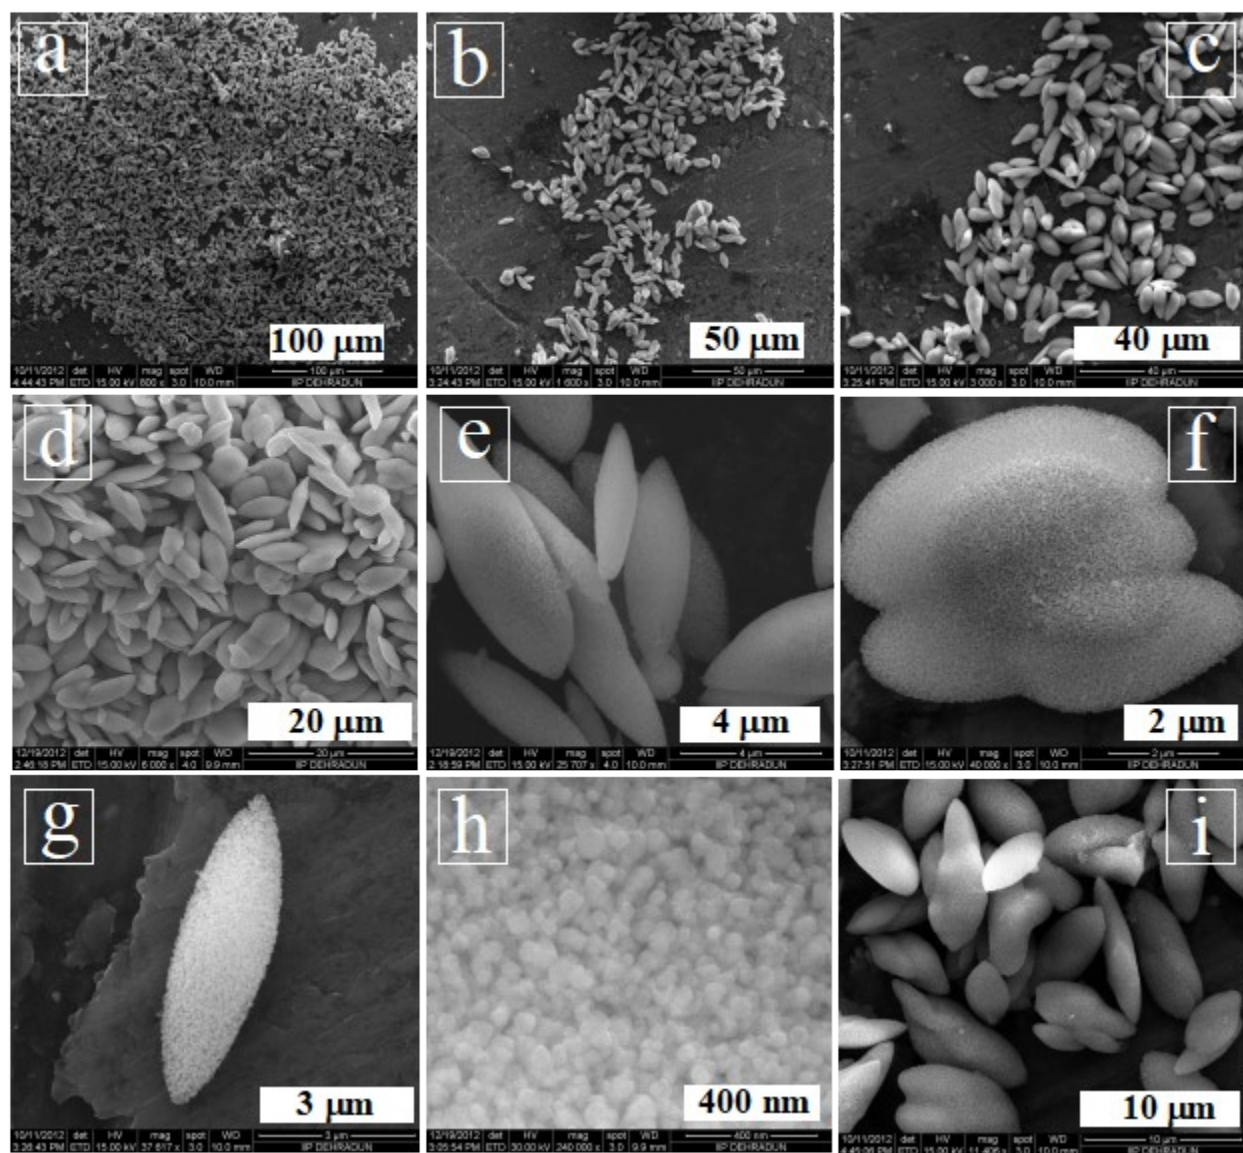

**Fig. S5** SEM images of fresh (a)-(h) at ascending resolutions and (i) that of spent  $\text{CrO}_x^{\text{K-SB}}$  catalyst

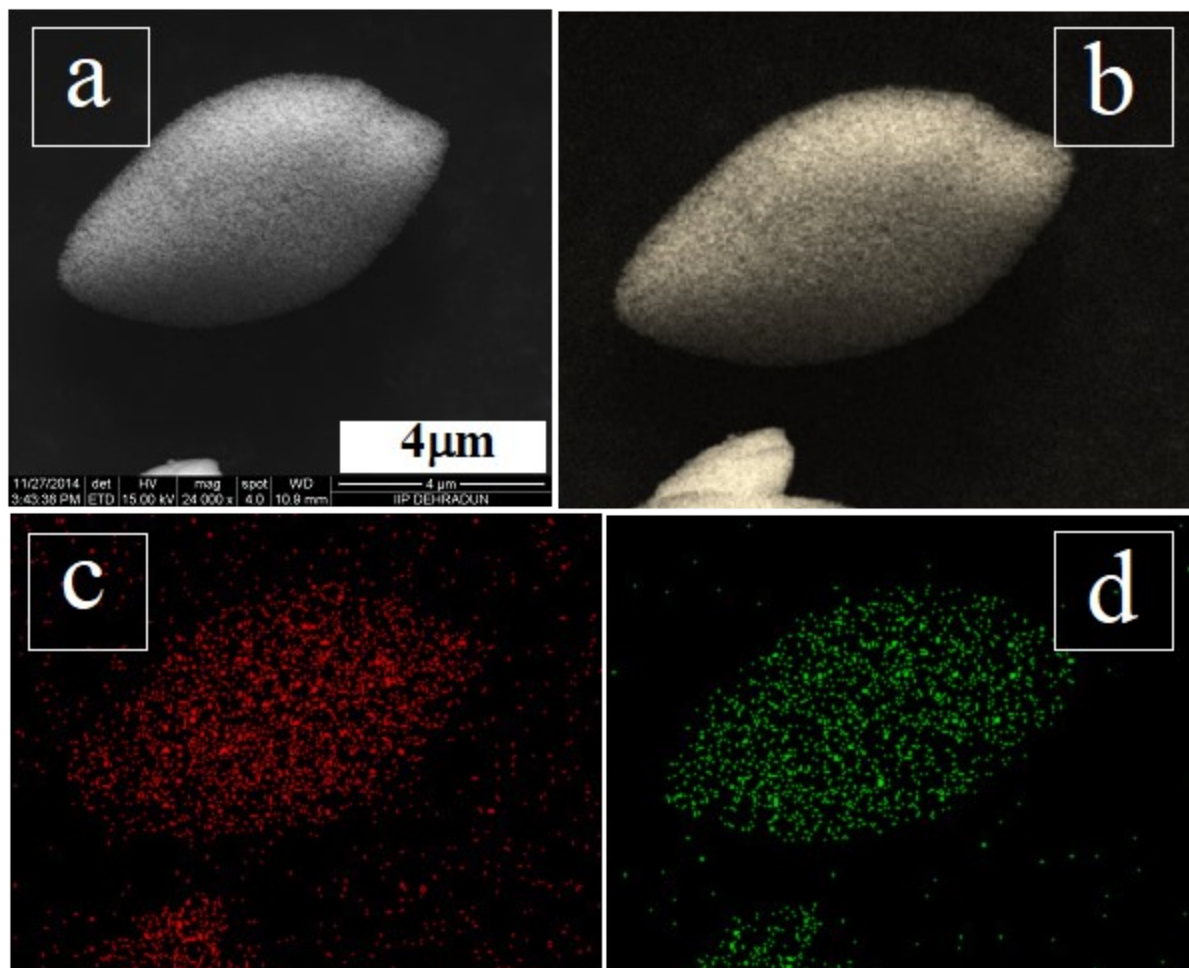

**Fig. S6** SEM images (a,b) and SEM-EDX mapping of (c) chromium and (d) oxygen in  $\text{CrO}_x^{\text{K-SB}}$  catalyst



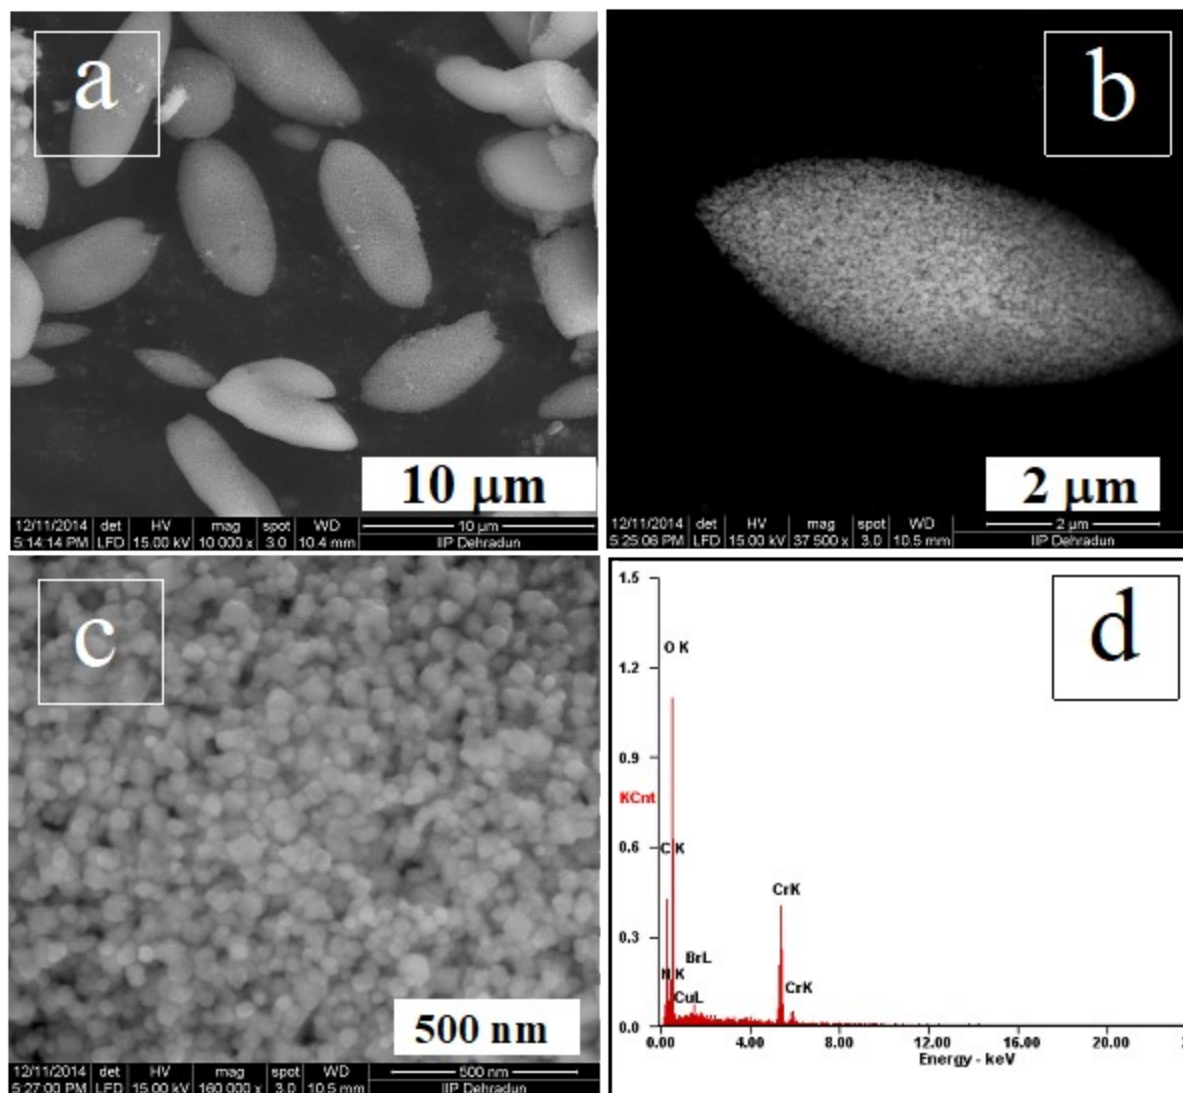

**Fig. S7** SEM images (a-c) of uncalcined  $\text{CrO}_x^{\text{K-SB}}$  catalyst and (d) corresponding EDX diagram demonstrating the presence of C and Br as impurities during catalyst synthesis

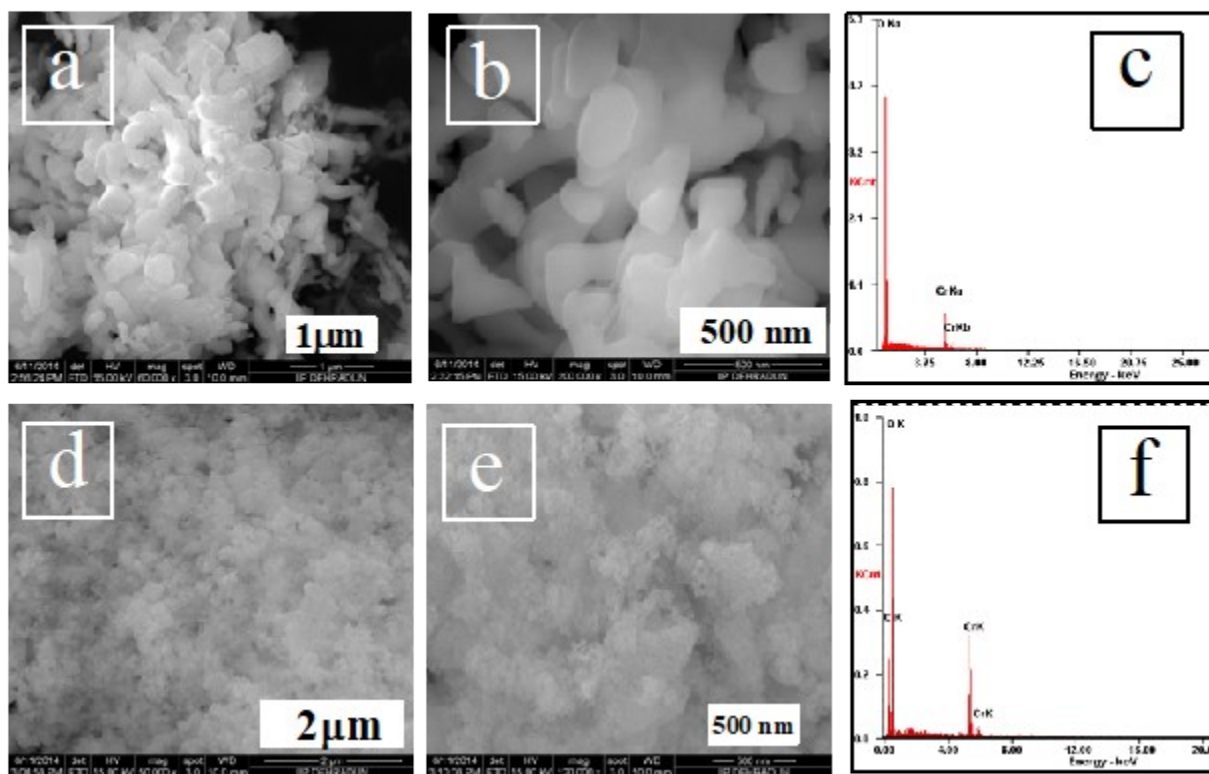

**Fig. S8** (a), (b) SEM and (c) SEM-EDAX image of Cr(III) oxide prepared by heating  $(\text{NH}_4)_2\text{Cr}_2\text{O}_7$  and (d), (e) SEM and (f) SEM-EDAX image of CTAB-promoted Cr(III) oxide nanoparticles i.e.  $\text{Cr}_2\text{O}_3^{\text{NIT}}$  prepared by using  $\text{Cr}(\text{NO}_3)_3 \cdot 9\text{H}_2\text{O}$ .

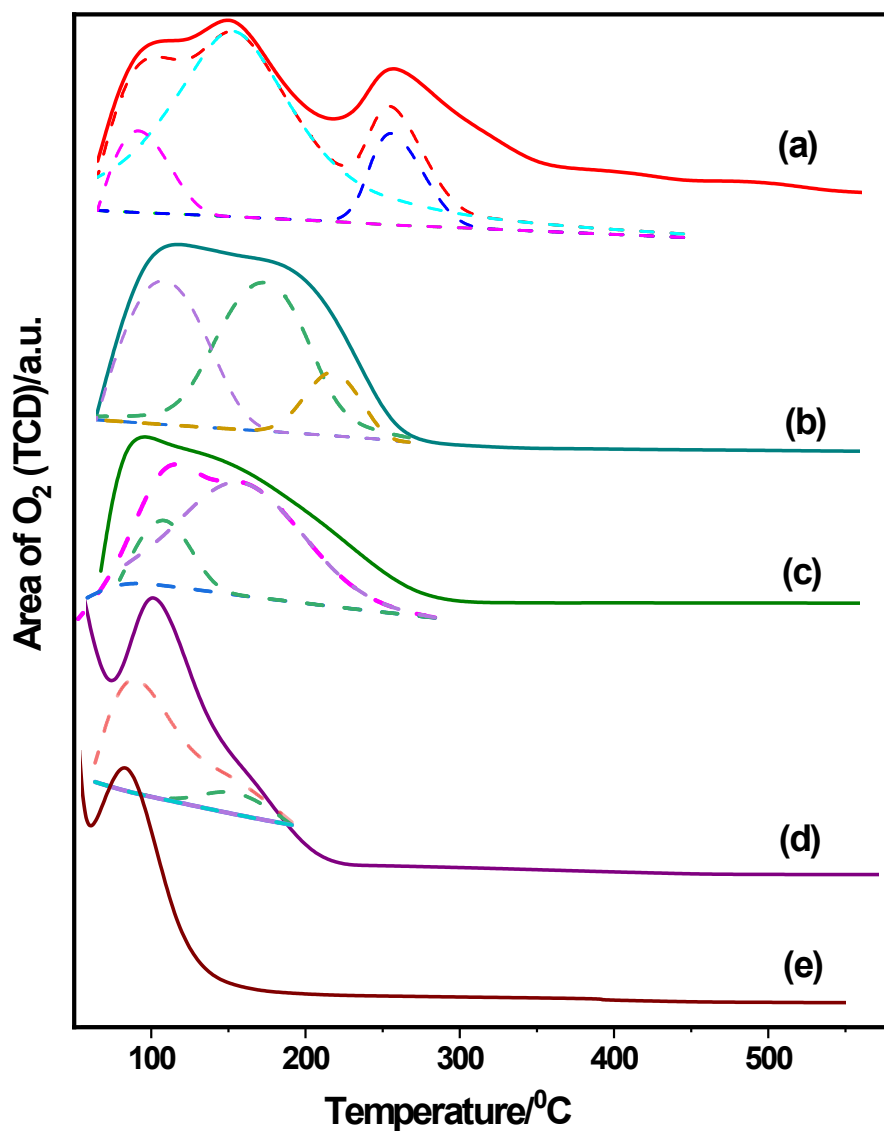

**Fig. S9** O<sub>2</sub>-TPD plots of (a) CrO<sub>x</sub><sup>K-SB</sup>, (b) Chromium oxide prepared using (chromic acid + NH<sub>4</sub>OH) mixture, followed by drying (CrO<sub>x</sub><sup>AH</sup>) (c) chromium oxide generated heating ammonium dichromate, (d) commercial Cr(VI) oxide, (d) Cr<sub>2</sub>O<sub>3</sub><sup>NIT</sup> and (e) commercial Cr<sub>2</sub>O<sub>3</sub>

## References

1. S. Kawi and M. Te, *Catal. Today*, 1998, **44**, 101.
2. A. K. Sinha and K. Suzuki, *Angew. Chem.*, 2005, **44**, 271.
3. H. Rotter, M. V. Landau and M. Herskowitz, *Environ. Sci. Technol.*, 2005, **39**, 6845.
4. A. K. Sinha and K. Suzuki, *Appl. Catal. B*, 2007, **70**, 417.
5. Y. Wang, X. Yuan, X. Liu, J. Ren, W. Tong, Y. Wang and G. Lu, *Solid State Sci.*, 2008, **10**, 1117.
6. Y. S. Xia, H. X. Dai, H. Y. Jiang, J. G. Deng, H. He and C. T. Au, *Environ. Sci. Technol.* 2009, **43**, 8355.
7. M. Popova, Á. Szegedi, Z. Cherkezova-Zheleva, A. Dimitrova and I. Mitov, *Appl. Catal. A*, 2010, **381**, 26–35.
8. Q. Q. Huang, Z. H. Meng and R. X. Zhou, *Appl. Catal. B*, 2012, **115–116**, 179.
9. G. Bai, H. Dai, Y. Liu, K. Ji, X. Li and S. Xie, *Catal. Commun.*, 2013, **36**, 43
10. T. Xing, H. Wana, Y. Shao, Y. Hana, Z. Xu and S. Zheng, *Appl. Catal. A*, 2013, **468**, 269.
11. P. Yang, Z. Shi, S. Yang and R. Zhou, *Chem. Eng. Sci.*, 2015, **126**, 361–369
12. Y. Jiao, X. Chen, F. He and S. Liu, *Chem. Eng. J.*, 2019, **372**, 107.
13. X. Chen, X. Chen, S. Cai, E. Yu, J. Chen and H. Jia, *Appl. Surf. Sci.*, 2019, **475**, 312.
14. Y. Zhang, H. Zhang and Y. Yan, *Sep. Purif. Technol.*, 2020, **251**, 116827
